# Supplementary material for: Identifying genetically redundant accessions in the world’s largest cassava collection
Source: PubMed Central journal article supplement (PMC10830726; doi:10.3389/fpls.2023.1338377), 2024-01-18
Supplement: DataSheet_1.pdf [file DataSheet_1.pdf]

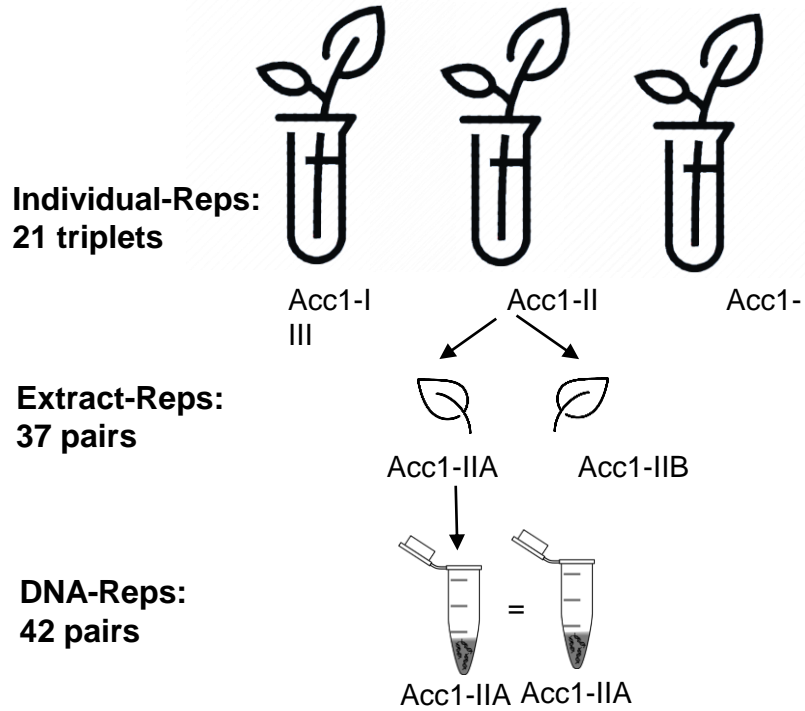

**Supplementary Figure 1.** Twenty-one cassava (*M. esculenta*) accessions from the CIAT core collection were selected to produce three types of replicates (i) different individuals from the same accession “Individual-Reps”, (ii) different DNA samples extracted from the same individual “Extract-Reps”, and (iii) the same DNA sample analyzed twice “DNA-Reps”.

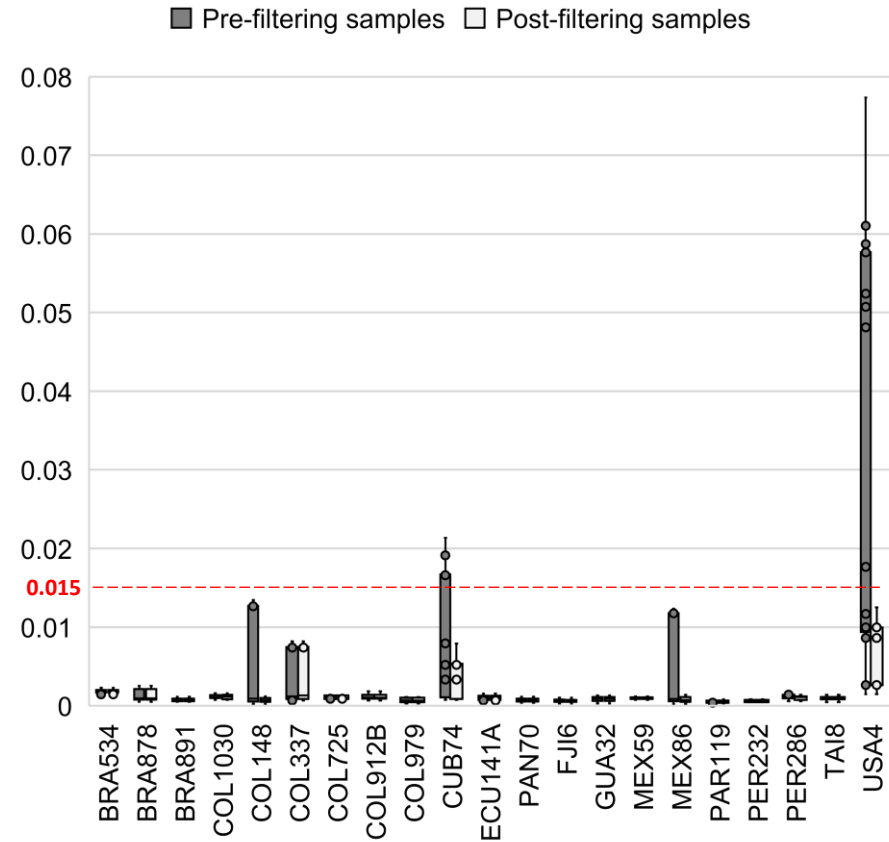

**Supplementary Figure 2.** Boxplot illustrating the distribution of genetic distances per accession for pre-filtered and post-filtered samples. The dashed red line shows the new allowed threshold of 0.015 with the SNPs dataset.

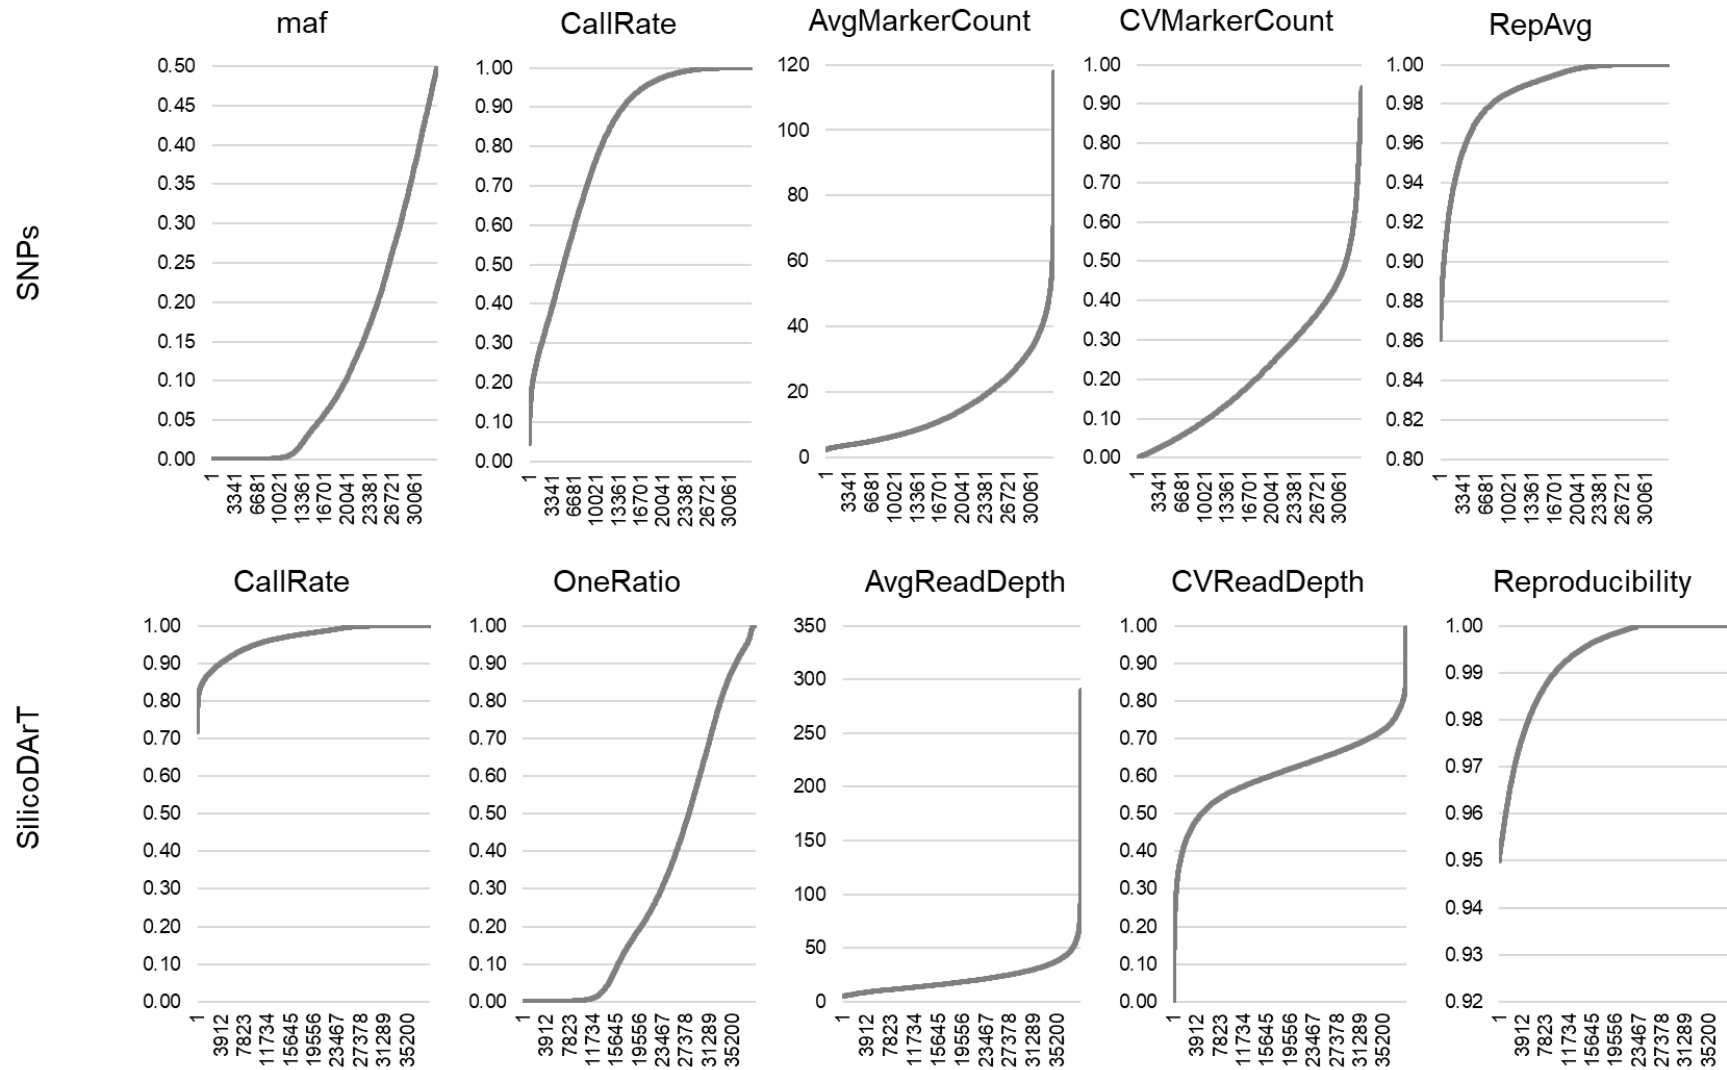

**Supplementary Figure 3.** Plots illustrating the distribution of the used marker-quality parameters across the 5,302 accessions and 33,395 SNPs (upper) or 39,103 SilicoDART markers (lower).

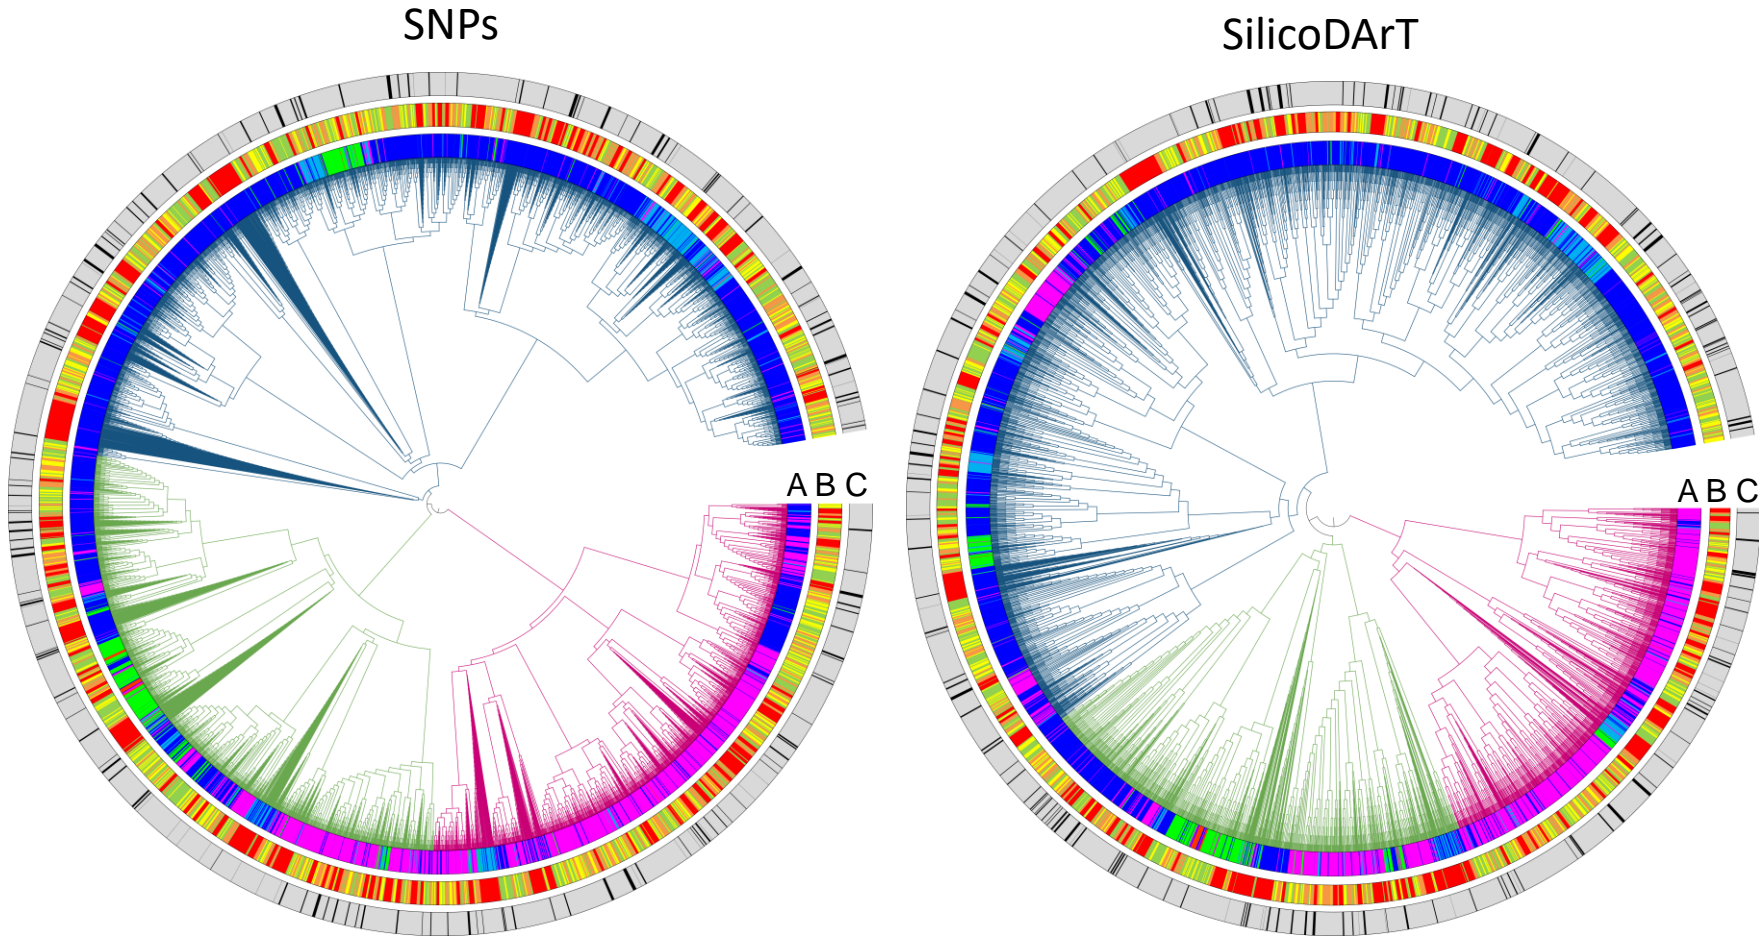

**A. Region**

- West South America
- East South America
- Central/North America & Caribbean
- Asia
- Africa

**B. MLG size**

- C1
- C2
- C3-C5
- C6-C87

**C. Approaches comparison**

- Consistency
- Discrepancy

**Supplementary Figure 4.** Clustering patterns of 5,302 accessions compared to genetic redundancy patterns across diverse regions and marker types. Dendrograms resulting from ward.D2 linkage method analysis using IBS (SNPs; left) and Jaccard (SilicoDArT; right) distances is presented. Cluster 1 (pink) mainly includes East South American accessions, Cluster 2 (green) consists of diverse accessions from East and West South America, Asia, and Africa, and Cluster 3 (blue) primarily features West South American accessions, with some from Central/North America and the Caribbean. Around dendrograms, accessions are color-coded by region (A), MLG size categories (B), and discrepancies in MLGs detection between SNPs and SilicoDArT (C).

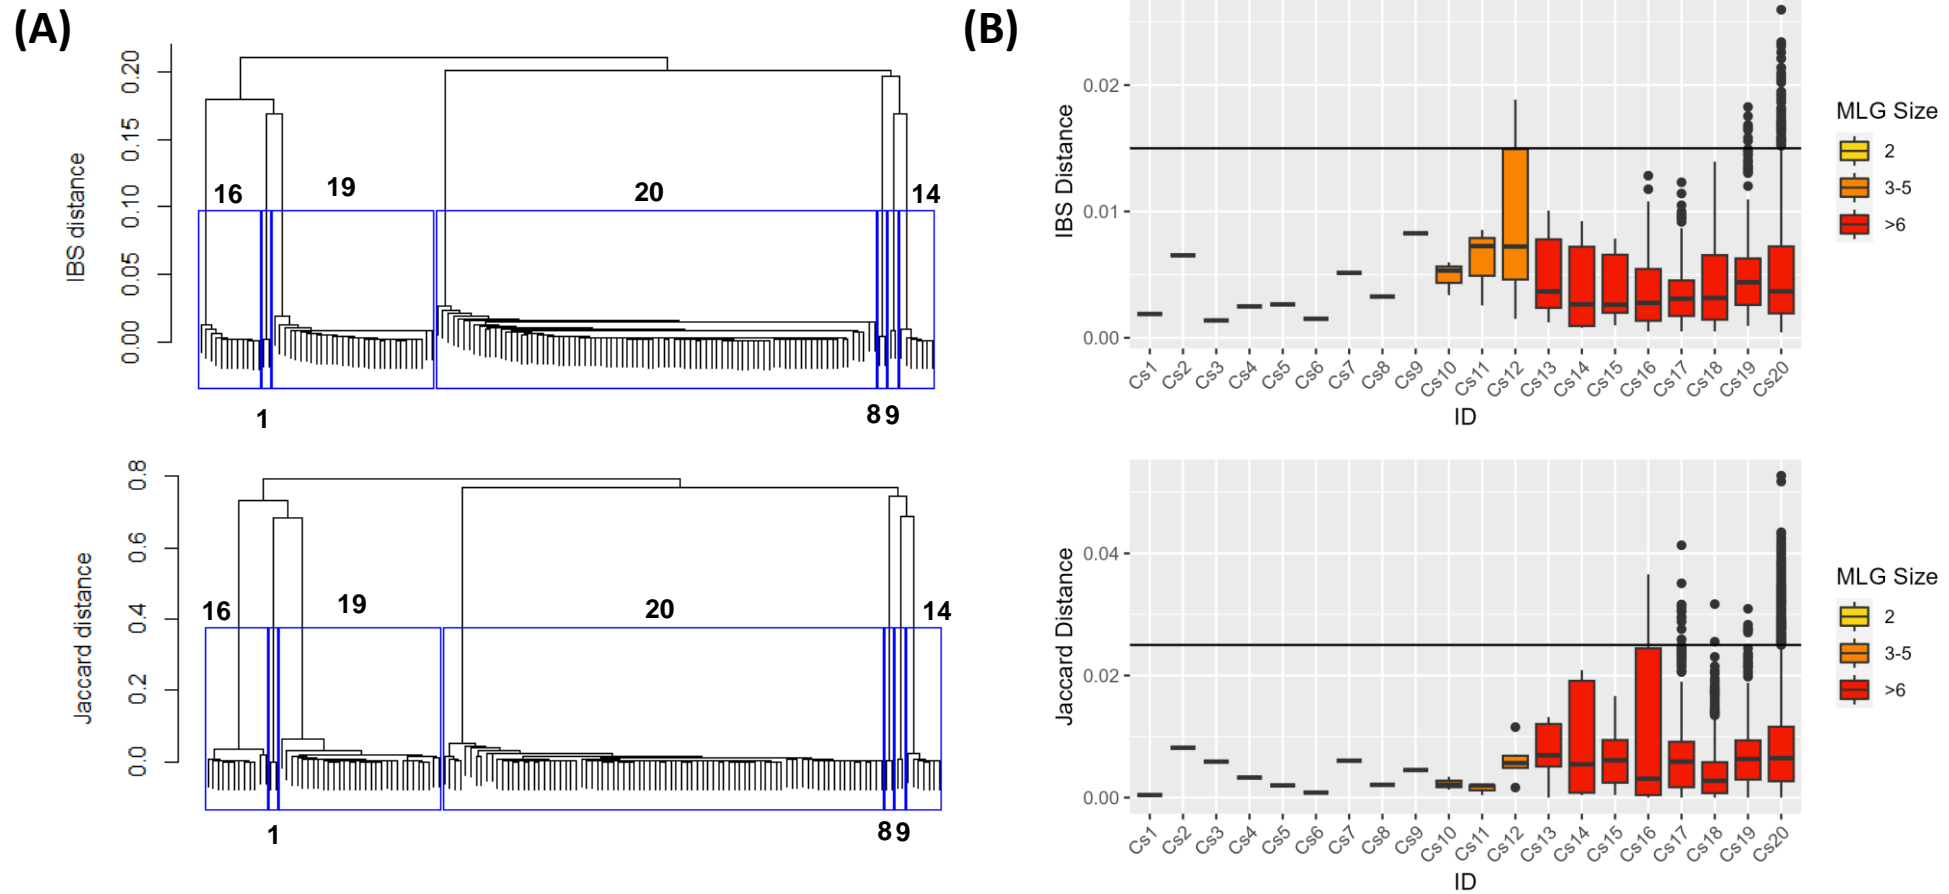

**Supplementary Figure 5.** (A) Complete-linkage hierarchical agglomerative clustering of cases 1, 8,9,14,16,19,20 from multi-accession MLGs prepared using IBS (upper) and Jaccard (lower) genetic distances. (B) Dispersion of genetic distances among pairs of accessions within multi-accession MLGs of varying group sizes, cases 1 to 20. The upper boxplot displays IBS distances estimated from SNPs. The lower boxplot shows Jaccard distances estimated from SilicoDArT markers. Group sizes are categorized and represented in different colors. Thresholds 0.015 and 0.025 are shown with a black line.

**Supplementary Table 1.** Summary of accessions and the number of technical and biological replicates utilized in this study. Several samples served multiple purposes, leading to varying numbers of replicates per accession. The total samples per accession are indicated below

| Accession    | DNA-Reps  |           | Extract-Reps |           | Individual-Reps |           | Country   | All samples |
|--------------|-----------|-----------|--------------|-----------|-----------------|-----------|-----------|-------------|
|              | samples   | pairs     | samples      | pairs     | samples         | trio      |           |             |
| BRA534       | 4         | 2         | 4            | 2         | 3               | 1         | Brazil    | 7           |
| BRA878       | 4         | 2         | 4            | 2         | 3               | 1         | Brazil    | 7           |
| BRA891       | 4         | 2         | 4            | 2         | 3               | 1         | Brazil    | 7           |
| COL1030      | 4         | 2         | 2            | 1         | 3               | 1         | Colombia  | 6           |
| COL148       | 4         | 2         | 4            | 2         | 3               | 1         | Colombia  | 7           |
| COL337       | 4         | 2         | 4            | 2         | 3               | 1         | Colombia  | 7           |
| COL725       | 4         | 2         |              |           | 3               | 1         | Colombia  | 5           |
| COL912B      | 4         | 2         | 4            | 2         | 3               | 1         | Colombia  | 7           |
| COL979       | 4         | 2         | 4            | 2         | 3               | 1         | Colombia  | 7           |
| CUB74        | 4         | 2         | 4            | 2         | 3               | 1         | Cuba      | 7           |
| ECU141A      | 4         | 2         | 4            | 2         | 3               | 1         | Ecuador   | 7           |
| FJI6         | 4         | 2         | 4            | 2         | 3               | 1         | Fiji      | 7           |
| GUA32        | 4         | 2         | 4            | 2         | 3               | 1         | Guatemala | 7           |
| MEX59        | 4         | 2         | 4            | 2         | 3               | 1         | Mexico    | 7           |
| MEX86        | 4         | 2         | 4            | 2         | 3               | 1         | Mexico    | 7           |
| PAN70        | 4         | 2         | 4            | 2         | 3               | 1         | Panama    | 7           |
| PAR119       | 4         | 2         | 2            | 1         | 3               | 1         | Paraguay  | 6           |
| PER232       | 4         | 2         | 2            | 1         | 2               | 1         | Peru      | 5           |
| PER286       | 4         | 2         | 4            | 2         | 3               | 1         | Peru      | 7           |
| TAI8         | 4         | 2         | 4            | 2         | 3               | 1         | Thailand  | 7           |
| USA4         | 4         | 2         | 4            | 2         | 3               | 1         | USA       | 7           |
| <b>Total</b> | <b>84</b> | <b>42</b> | <b>74</b>    | <b>37</b> | <b>62</b>       | <b>21</b> |           | <b>141</b>  |

**Supplementary Table 2.** Statistical summary of sample-quality parameters across 5,555 samples and the thresholds used to select high-quality samples. Number of total samples below parameter threshold are shown.

| Quality parameter                       | Min     | Q1      | median  | mean    | Q3      | Max     | Thershold       | Samples below threshold |
|-----------------------------------------|---------|---------|---------|---------|---------|---------|-----------------|-------------------------|
| Tagcounttotal                           | 1007722 | 2160390 | 2296789 | 2306247 | 2475498 | 3995430 | > 1,500,00      | 7                       |
| Tagcountunique                          | 92395   | 349765  | 382200  | 385875  | 414168  | 1136722 | > 230,000       | 27                      |
| Individual SNP callrate                 | 0.110   | 0.800   | 0.810   | 0.811   | 0.830   | 0.910   | > 0.73          | 72                      |
| Individual observed heterozygosity (Ho) | 0.000   | 0.080   | 0.090   | 0.088   | 0.090   | 0.200   | > 0.05 & < 0.16 | 79                      |
| Individual SilicoDArT callrate          | 0.865   | 0.962   | 0.970   | 0.969   | 0.978   | 1.000   | > 0.996         | 30                      |
| Individual SilicoDArT OneRation         | 0.040   | 0.270   | 0.270   | 0.273   | 0.280   | 0.350   | < 0.2           | 21                      |

**Supplementary Table 3.** Summary of samples that either failed or passed all the 6 quality parameters (QP) reviewed and listed in Supplementary Table 2.

| Number of failed QP.                                         | Target QC  |             |          | Total       |
|--------------------------------------------------------------|------------|-------------|----------|-------------|
|                                                              | good       | downshifted | weak     |             |
| 0                                                            | 5407       | 3           | 2        | <b>5412</b> |
| 1                                                            | 99         | 2           | 0        | 101         |
| 2                                                            | 14         | 2           | 0        | 16          |
| 3                                                            | 9          | 9           | 0        | 18          |
| 4                                                            | 3          | 0           | 0        | 3           |
| 5                                                            | 0          | 3           | 0        | 3           |
| 6                                                            | 0          | 2           | 0        | 2           |
| Number of replicated samples that failed to QP               | 10         | 0           | 0        | 10          |
| Number of non-replicated samples that failed QP              | 115        | 18          | 0        | 133         |
| <b>Number of removed samples from the analysis</b>           | <b>125</b> | <b>18</b>   | <b>0</b> | <b>143</b>  |
| Number of total samples assessed in this study               | 5532       | 21          | 2        | 5555        |
| <b>Number of unique accessions retained for MLG analysis</b> |            |             |          | <b>5302</b> |

**Supplementary Table 4.** Statistical summary of marker-quality parameters across 5,302 and the thresholds used to select high-quality SNP and SilicoDArT markers. Number of total markers retained for subsequent analysis are shown.

| Marker     | Parameter              | Min     | Q1       | median   | mean     | Q3       | Max       | Threshold | SNPs number retained | (%) SNPs retained |
|------------|------------------------|---------|----------|----------|----------|----------|-----------|-----------|----------------------|-------------------|
| SNPs       | no filters applied     | –       | –        | –        | –        | –        | –         | –         | 33,395               | 100               |
|            | maf                    | 0.00009 | 0.00094  | 0.05789  | 0.12282  | 0.21191  | 0.50000   | ≥ 0.001   | 24,915               | 74.6              |
|            | Callrate               | 0.04413 | 0.68446  | 0.94549  | 0.81456  | 0.99566  | 1.00000   | ≥ 0.8     | 16,962               | 50.8              |
|            | AvgMarkerCount         | 2.51000 | 5.84600  | 11.32000 | 15.49900 | 21.93000 | 117.66800 | ≥ 12      | 8,959                | 26.8              |
|            | CVMarkerCount          | 0.00001 | 0.07491  | 0.18578  | 0.22167  | 0.33266  | 0.94230   | ≤ 0.6     | 8,582                | 25.7              |
|            | RepAvg                 | 0.86080 | 0.98240  | 0.99460  | 0.98540  | 0.99980  | 1.00000   | ≥ 0.98    | 7,890                | 23.6              |
|            | Mapped to genome Refv7 | –       | –        | –        | –        | –        | –         | –         | 7,180                | 21.5              |
| SilicoDArT | no filters applied     | –       | –        | –        | –        | –        | –         | –         | 39,103               | 100               |
|            | Callrate               | 0.71690 | 0.95060  | 0.98230  | 0.96650  | 0.99940  | 1.00000   | ≥ 0.95    | 29,411               | 75.2              |
|            | OneRatio               | 0.00019 | 0.00321  | 0.19315  | 0.31374  | 0.58017  | 0.99981   | ≥ 0.05    | 14,990               | 38.3              |
|            | AvgReadDepth           | 5.00100 | 12.33300 | 18.36400 | 21.53200 | 27.35600 | 289.92800 | ≥ 12      | 10,171               | 26.0              |
|            | CVReadDepth            | 0.00000 | 0.55930  | 0.61950  | 0.60940  | 0.67530  | 0.99500   | ≤ 0.7     | 8,321                | 21.3              |
|            | RepAvg                 | 0.95000 | 0.99060  | 0.99840  | 0.99290  | 1.00000  | 1.00000   | ≥ 0.98    | 8,186                | 20.9              |

| Descriptor               | Descriptor level         | Case     | 1        | 2        | 3        | 4        | 5        | 6        | 7        | 8        | 9        | 10       | 11       | 12       | 13       | 14       | 15        | 16        | 17        | 18        | 19        | 20        |           |    |
|--------------------------|--------------------------|----------|----------|----------|----------|----------|----------|----------|----------|----------|----------|----------|----------|----------|----------|----------|-----------|-----------|-----------|-----------|-----------|-----------|-----------|----|
|                          |                          | MLG      | 4        | 5        | 13       | 25       | 37       | 42       | 47       | 49       | 207      | 11       | 35       | 16       | 246      | 8        | 393       | 252       | 116       | 118       | 231       | 739       | 453       |    |
|                          |                          | size     | 2        | 2        | 2        | 2        | 2        | 2        | 2        | 2        | 2        | 3        | 3        | 4        | 6        | 7        | 7         | 12        | 28        | 29        | 31        | 84        |           |    |
| ShapeCentralLeaf         | Elliptic-Lanceolate      |          | 1        |          |          |          | 1        |          |          |          |          |          |          |          |          |          |           |           |           |           | 3         | 1         | 6         |    |
|                          | Lanceolate               |          | 1        | 2        | 1        | 1        | 1        | 2        | 2        |          | 1        | 1        | 2        | 1        | 5        | 5        | 5         | 3         | 22        | 8         | 3         | 69        |           |    |
|                          | Linear-pandurate         |          |          |          |          |          |          |          |          |          |          |          |          |          |          |          |           | 2         | 1         |           |           | 3         | 1         |    |
|                          | Linear-Pyramidal         |          |          |          |          |          |          |          |          |          |          |          |          |          |          |          | 1         |           |           |           |           |           | 1         |    |
|                          | Oblong-Lanceolate        |          |          |          |          |          |          |          |          |          | 1        |          |          |          |          |          |           |           | 1         |           |           |           |           |    |
|                          | Obovate-Lanceolate       |          |          |          | 1        |          |          |          |          |          |          |          |          |          |          |          |           |           |           |           |           | 15        |           |    |
|                          | Ovoid                    |          |          |          |          |          |          |          |          |          | 2        |          |          |          |          |          |           |           |           |           |           | 1         |           |    |
|                          | Pandurate                |          |          |          |          |          |          |          |          |          |          |          |          |          |          |          |           |           |           |           |           |           | 2         | 1  |
|                          | Straight or linear       |          |          |          |          |          |          |          |          |          |          |          |          |          | 1        | 1        |           | 4         |           |           |           |           |           | 11 |
|                          | <b>Grand Total</b>       |          |          | <b>2</b> | <b>2</b> | <b>2</b> | <b>1</b> | <b>2</b> | <b>2</b> | <b>2</b> | <b>2</b> | <b>2</b> | <b>3</b> | <b>3</b> | <b>4</b> | <b>6</b> | <b>6</b>  | <b>7</b>  | <b>10</b> | <b>26</b> | <b>27</b> | <b>18</b> | <b>77</b> |    |
|                          | <b>Number levels/MLG</b> |          |          | <b>2</b> | <b>1</b> | <b>2</b> | <b>1</b> | <b>2</b> | <b>1</b> | <b>1</b> | <b>1</b> | <b>2</b> | <b>2</b> | <b>2</b> | <b>3</b> | <b>2</b> | <b>2</b>  | <b>3</b>  | <b>4</b>  | <b>3</b>  | <b>5</b>  | <b>4</b>  | <b>4</b>  |    |
| PetioleColor             | Green                    |          |          |          |          |          |          |          | 1        | 2        |          | 2        |          |          |          |          |           |           | 2         | 1         |           |           |           |    |
|                          | Green with little red    |          |          |          |          |          |          |          |          |          |          |          |          |          |          |          |           |           |           |           |           |           | 1         |    |
|                          | Purple                   |          |          |          |          |          |          |          |          |          |          |          |          |          |          |          |           |           | 1         |           |           |           | 1         |    |
|                          | Red                      |          |          |          |          |          |          |          |          |          |          |          |          |          | 2        |          | 1         | 5         |           | 4         | 5         | 1         |           |    |
|                          | Red with little green    |          | 2        | 1        | 1        |          |          |          |          | 2        |          |          | 1        | 2        | 1        | 1        |           |           | 1         |           | 2         | 1         |           |    |
|                          | Yellowish Green          |          |          |          |          |          |          |          |          |          |          |          |          |          | 2        |          |           |           | 1         | 1         |           |           | 2         |    |
|                          | <b>Grand Total</b>       |          | <b>2</b> | <b>1</b> | <b>1</b> |          |          |          | <b>1</b> | <b>2</b> | <b>2</b> |          | <b>3</b> | <b>4</b> | <b>3</b> | <b>3</b> | <b>1</b>  | <b>8</b>  | <b>3</b>  | <b>7</b>  | <b>7</b>  | <b>4</b>  |           |    |
| <b>Number levels/MLG</b> |                          | <b>1</b> | <b>1</b> | <b>1</b> | ND       | ND       | ND       | <b>1</b> | <b>1</b> | <b>1</b> | ND       | <b>2</b> | <b>2</b> | <b>2</b> | <b>2</b> | <b>1</b> | <b>4</b>  | <b>2</b>  | <b>3</b>  | <b>3</b>  | <b>3</b>  |           |           |    |
| Color1stExpandedLeaf     | dark green               |          | 2        | 1        | 1        |          |          |          |          | 2        | 2        |          | 3        | 3        | 3        | 3        | 1         | 6         | 3         | 7         | 7         | 3         |           |    |
|                          | light green              |          |          |          |          |          |          |          | 1        |          |          |          |          | 1        |          |          |           |           | 1         |           |           |           | 1         |    |
|                          | <b>Grand Total</b>       |          | <b>2</b> | <b>1</b> | <b>1</b> |          |          |          | <b>1</b> | <b>2</b> | <b>2</b> |          | <b>3</b> | <b>4</b> | <b>3</b> | <b>3</b> | <b>1</b>  | <b>7</b>  | <b>3</b>  | <b>7</b>  | <b>7</b>  | <b>4</b>  |           |    |
| <b>Number levels/MLG</b> |                          | <b>1</b> | <b>1</b> | <b>1</b> | ND       | ND       | ND       | <b>1</b> | <b>1</b> | <b>1</b> | ND       | <b>1</b> | <b>2</b> | <b>1</b> | <b>1</b> | <b>1</b> | <b>2</b>  | <b>1</b>  | <b>1</b>  | <b>1</b>  | <b>1</b>  | <b>2</b>  |           |    |
| NumberLeafLobes          | five                     |          | 1        |          |          |          |          |          |          | 1        |          |          |          |          | 2        |          |           | 2         | 1         | 3         | 4         |           |           |    |
|                          | nine                     |          |          |          |          |          |          |          | 1        |          |          |          |          |          |          |          |           |           |           |           |           |           | 2         |    |
|                          | seven                    |          | 1        | 1        | 1        |          |          |          |          | 1        | 2        |          | 3        | 4        | 1        | 2        | 1         | 5         | 2         | 2         | 1         | 2         |           |    |
|                          | three                    |          |          |          |          |          |          |          |          |          |          |          |          |          |          |          | 1         |           |           |           |           |           |           |    |
| <b>Grand Total</b>       |                          | <b>2</b> | <b>1</b> | <b>1</b> |          |          |          | <b>1</b> | <b>2</b> | <b>2</b> |          | <b>3</b> | <b>4</b> | <b>3</b> | <b>3</b> | <b>1</b> | <b>7</b>  | <b>3</b>  | <b>5</b>  | <b>5</b>  | <b>4</b>  |           |           |    |
| <b>Number levels/MLG</b> |                          | <b>2</b> | <b>1</b> | <b>1</b> | ND       | ND       | ND       | <b>1</b> | <b>2</b> | <b>1</b> | ND       | <b>1</b> | <b>1</b> | <b>1</b> | <b>2</b> | <b>1</b> | <b>1</b>  | <b>1</b>  | <b>1</b>  | <b>1</b>  | <b>1</b>  | <b>2</b>  |           |    |
| ColorRootPulp            | Cream                    |          |          |          |          | 2        |          |          |          |          |          |          |          | 1        | 4        |          |           |           |           |           |           |           | 54        |    |
|                          | White                    |          | 2        | 2        | 2        | 1        |          | 2        | 2        |          | 1        | 3        | 2        | 3        | 5        | 1        | 7         | 7         | 25        | 26        | 11        | 18        |           |    |
|                          | Yellow                   |          |          |          |          |          |          |          |          |          |          |          |          | 1        |          | 1        |           |           |           |           |           |           | 5         |    |
|                          | <b>Grand Total</b>       |          | <b>2</b> | <b>2</b> | <b>2</b> | <b>1</b> | <b>2</b> | <b>2</b> | <b>2</b> |          | <b>1</b> | <b>3</b> | <b>3</b> | <b>4</b> | <b>5</b> | <b>6</b> | <b>7</b>  | <b>7</b>  | <b>25</b> | <b>26</b> | <b>11</b> | <b>77</b> |           |    |
| <b>Number levels/MLG</b> |                          | <b>1</b> | <b>1</b> | <b>1</b> | <b>1</b> | <b>1</b> | <b>1</b> | <b>1</b> | ND       | <b>1</b> | <b>1</b> | <b>2</b> | <b>2</b> | <b>1</b> | <b>3</b> | <b>1</b> | <b>1</b>  | <b>1</b>  | <b>1</b>  | <b>1</b>  | <b>1</b>  | <b>3</b>  |           |    |
| BiologicalStatus         | BreedersLine             |          |          |          | 1        | 1        | 1        |          |          |          |          |          |          | 3        | 3        | 1        | 1         |           |           |           |           | 2         | 3         |    |
|                          | Landrace                 |          | 2        | 2        | 1        | 1        | 1        | 2        | 2        | 2        | 2        | 3        |          | 1        | 5        | 6        | 7         | 12        | 28        | 27        | 28        | 83        |           |    |
|                          | <b>Grand Total</b>       |          | <b>2</b> | <b>2</b> | <b>2</b> | <b>2</b> | <b>2</b> | <b>2</b> | <b>2</b> | <b>2</b> | <b>2</b> | <b>3</b> | <b>3</b> | <b>4</b> | <b>6</b> | <b>7</b> | <b>7</b>  | <b>12</b> | <b>28</b> | <b>29</b> | <b>31</b> | <b>84</b> |           |    |
| <b>Number levels/MLG</b> |                          | <b>1</b> | <b>1</b> | <b>2</b> | <b>2</b> | <b>2</b> | <b>1</b> | <b>1</b> | <b>1</b> | <b>1</b> | <b>1</b> | <b>1</b> | <b>2</b> | <b>2</b> | <b>2</b> | <b>1</b> | <b>1</b>  | <b>2</b>  | <b>2</b>  | <b>2</b>  | <b>2</b>  | <b>2</b>  |           |    |
| CountriesOrigin          | ARG                      |          |          |          |          |          |          |          |          |          |          |          |          |          |          |          |           | 2         |           | 1         | 16        |           |           |    |
|                          | BRA                      |          | 2        |          | 1        |          | 1        | 2        | 2        | 2        |          |          |          |          | 2        | 1        | 5         | 9         |           | 14        | 8         | 3         |           |    |
|                          | CHN                      |          |          |          |          |          |          |          |          |          |          |          |          |          |          |          | 1         |           |           |           |           |           |           |    |
|                          | COL                      |          |          |          | 1        |          |          |          |          |          |          |          | 3        | 4        |          | 6        |           |           | 28        | 10        | 4         | 78        |           |    |
|                          | CRI                      |          |          |          |          |          |          |          |          |          |          |          |          |          |          |          |           |           |           |           |           | 1         |           |    |
|                          | CUB                      |          |          |          |          |          |          |          |          |          |          |          |          |          |          |          |           |           |           | 1         |           |           |           |    |
|                          | ECU                      |          |          |          |          |          |          |          |          |          |          |          |          |          |          |          |           |           |           |           |           |           | 1         |    |
|                          | GTM                      |          |          |          |          |          |          |          |          |          | 2        |          |          |          |          |          |           |           |           |           |           |           |           |    |
|                          | MEX                      |          |          |          |          |          |          |          |          |          |          |          |          |          |          | 1        |           |           |           |           |           |           |           |    |
|                          | MYS                      |          |          | 2        |          |          |          |          |          |          |          |          |          |          |          |          |           |           |           |           |           |           |           |    |
|                          | PAN                      |          |          |          |          |          |          |          |          |          |          |          |          |          |          |          | 1         |           |           |           |           |           |           |    |
|                          | PER                      |          |          |          |          | 1        |          |          |          |          |          | 3        |          |          |          |          |           | 1         | 1         |           |           |           | 1         |    |
|                          | PRY                      |          |          |          |          |          |          |          |          |          |          |          |          |          |          | 1        |           |           |           |           | 1         | 2         |           |    |
| THA                      |                          |          |          |          | 1        |          |          |          |          |          |          |          |          |          |          |          |           |           |           |           |           |           |           |    |
| VEN                      |                          |          |          |          |          | 1        |          |          |          |          |          |          |          | 1        |          |          |           |           |           | 2         |           | 1         |           |    |
| <b>Grand Total</b>       |                          | <b>2</b> | <b>2</b> | <b>2</b> | <b>2</b> | <b>2</b> | <b>2</b> | <b>2</b> | <b>2</b> | <b>2</b> | <b>3</b> | <b>3</b> | <b>4</b> | <b>6</b> | <b>7</b> | <b>7</b> | <b>12</b> | <b>28</b> | <b>29</b> | <b>31</b> | <b>84</b> |           |           |    |
| <b>Number levels/MLG</b> |                          | <b>1</b> | <b>1</b> | <b>2</b> | <b>2</b> | <b>2</b> | <b>1</b> | <b>1</b> | <b>1</b> | <b>1</b> | <b>1</b> | <b>1</b> | <b>1</b> | <b>5</b> | <b>2</b> | <b>3</b> | <b>3</b>  | <b>1</b>  | <b>6</b>  | <b>5</b>  | <b>5</b>  |           |           |    |

**Supplementary Table 5.** Descriptors of passport and characterization data of selected 20 cases of MLGs with varying group size. The number of accessions with the specific descriptors is provided. Not determined (ND)
